# Supplementary material for: Management of thrombotic microangiopathy in pregnancy and postpartum: report from an international working group
Source: Oxford University Press journal article supplement (doi:10.1182/blood.2020005221), 2020-08-17
Supplement: bloodbld2020005221-suppl1.pdf [file bloodbld2020005221-suppl1.pdf]

The members of The International Working Group on Pregnancy-Related Thrombotic Microangiopathies are:

Fadi Fakhouri, Service of Nephrology and Hypertension, Department of Medicine, Lausanne University Hospital, Lausanne, Switzerland.

Marie Scully, Department of Haematology and National Institute for Health Research Cardiometabolic Programme, UCLH/UCL BRC, London, United Kingdom.

François Provôt, Department of nephrology, Hôpital Huriez, CHRU de Lille, Lille and French Reference Center for Thrombotic Microangiopathies, Hôpital Saint Antoine, AP-HP, Paris, France.

Miquel Blasco, Department of Nephrology and Renal Transplantation, Hospital Clinic de Barcelona, Universitat de Barcelona, Spain

Paul Coppo, Department of hematology, Hôpital Saint-Antoine, Assistance Publique des Hôpitaux de Paris, Sorbonne Universités, and French Reference Center for Thrombotic Microangiopathies, Hôpital Saint Antoine, AP-HP, Paris, France.

Marina Noris, Istituto di Ricerche Farmacologiche Mario Negri IRCCS, Bergamo, Italy.

Kathy Paizis, Mercy Hospital for Women, Western Health Sunshine, Austin Health, Melbourne.

David Kavanagh, Complement Therapeutics Research Group :Translational and Clinical Research Institute, Newcastle University, Newcastle upon Tyne, and National Renal Complement Therapeutics Centre: Newcastle upon Tyne Hospitals NHS Foundation Trust, Newcastle upon Tyne, United Kingdom.

Frédéric Pène, Medical intensive care unit, Cochin hospital, Hôpitaux Universitaires Paris Centre, Assistance Publique - Hôpitaux de Paris, & Université de Paris & Institut Cochin, INSERM U1016 CNRS UMR8104, Paris, France.

Sol Quezada, Fetal Medicine Unit-SAMID, Department of Obstetrics and Gynaecology, University Hospital 12 de Octubre, 12 de Octubre Research Institute (imas12), Complutense University of Madrid, Madrid, Spain.

Alexandre Hertig, Sorbonne Université, Assistance Publique-Hôpitaux de Paris, Department of Kidney Transplantation, Hôpital Pitié-Salpêtrière, 47-83, boulevard de l'Hôpital, F-75013, Paris, France.

Sébastien Kissling, Service of Nephrology and Hypertension, Department of Medicine, Lausanne University Hospital, Lausanne, Switzerland

Patrick O'Brien, Institute for Women's Health, University College London Hospitals, London, United Kingdom

Yahsou Delmas, Department of nephrology, Centre de référence Maladies Rénales Rares du Sud-ouest, Centre Hospitalier Universitaire de Bordeaux, Bordeaux and French Reference Center for Thrombotic Microangiopathies, Hôpital Saint Antoine, AP-HP, Paris, France.

Lorenzo Alberio, Service and Central Laboratory of Hematology, Lausanne University Hospital, Switzerland

Norbert Winer, Department of Gynecology and Obstetrics and Clinical Investigation Center (CIC), University Hospital of Nantes, NUN, INRAE, UMR 1280, PhAN, and Université de Nantes, Nantes, France.

Agnès Veyradier, Service d'Hématologie biologique and EA3518 Université Paris Diderot, Groupe Hospitalier Saint Louis - Lariboisière, AP-HP, Paris and French Reference Center for Thrombotic Microangiopathies, Hôpital Saint Antoine, AP-HP, Paris, France.

Spero Cataland Division of Hematology, Ohio State University Columbus, Ohio, United States.

Véronique Frémeaux-Bacchi Assistance Publique-Hôpitaux de Paris, Hôpital Européen Georges Pompidou, Service d'Immunologie and Paris University, Paris, France

Chantal Loirat Department of Nephrology, University Hospital Robert Debré, Paris, France.<sup>20</sup>, Giuseppe Remuzzi<sup>7</sup>, Istituto di Ricerche Farmacologiche Mario Negri IRCCS, Bergamo, Italy.

Vassilis Tsatsaris, Université de Paris, Hôpital Cochin, AP-HP, FHU PREMA, Maternité Port-Royal, INSERM UMR 1139, 75014 Paris, France.

| Biological work-up in patients with pregnancy-associated TMA                                                                                                                                                                                      |                                                                                                                                                                                                                                                                                                                                                                                                                                                                                                                                                                                                                                                    |
|---------------------------------------------------------------------------------------------------------------------------------------------------------------------------------------------------------------------------------------------------|----------------------------------------------------------------------------------------------------------------------------------------------------------------------------------------------------------------------------------------------------------------------------------------------------------------------------------------------------------------------------------------------------------------------------------------------------------------------------------------------------------------------------------------------------------------------------------------------------------------------------------------------------|
| ADAMTS13 activity ± anti-ADAMTS13 antibodies                                                                                                                                                                                                      | P-TTP diagnosis is made if ADAMTS13 activity < 20%.                                                                                                                                                                                                                                                                                                                                                                                                                                                                                                                                                                                                |
| Serum soluble fms-like tyrosine kinase-1/Placental Growth Factor (sFlt1/PlGF)                                                                                                                                                                     | sFlt1/PlGF ratio > 85 before 34 weeks of gestation and (> 110 after 34 week) are strongly suggestive of preeclampsia/eclampsia or HELLP syndrome, whereas a ratio < 38 suggests an alternative diagnosis.                                                                                                                                                                                                                                                                                                                                                                                                                                          |
| <p style="text-align: center;"><i>Complement tests.</i></p> Serum levels of C3, C4, Factor H, Factor I and Factor B.<br>Test for anti-Factor H antibodies.<br>Sequencing of Factor H, Factor I, Membrane-Cofactor Protein, C3 and Factor B genes. | Pregnancy-associated HUS diagnosis is NOT based on complement test results <sup>1-3</sup> . Systemic markers of complement activation (low C3, elevated soluble C5b-9) are not synonymous of atypical HUS.<br>Complement activation may be transient and self-limited in some pregnancy-associated TMA <sup>4</sup> . The detection of a pathogenic complement variant confirms retrospectively the diagnosis of complement-mediated HUS but negative genetic tests do not rule out the diagnosis of pregnancy-associated HUS <sup>5,6</sup><br>Genetics tests are very helpful for the decision to discontinue or not eculizumab <sup>7-9</sup> . |
| <p style="text-align: center;"><i>Autoimmunity tests.</i></p> Antinuclear antibodies, anti-native DNA antibodies, anti-cardiolipin antibodies, anti-b2GPI antibodies, lupus anticoagulant.                                                        | Pregnancy-associated TMA resulting from systemic autoimmune diseases require specific treatments.                                                                                                                                                                                                                                                                                                                                                                                                                                                                                                                                                  |
| <p style="text-align: center;"><i>Other tests</i></p> Serum homocystein level.<br>Prothrombin time, factor V, fibrinogen, D-dimers serum levels.<br>Serum iron, vitamin B9 or B12 levels.                                                         | High homocystein serum level suggests cobalamin C deficiency-associated TMA, a diagnosis to rule out or confirm (specific treatment required) <sup>10-12</sup> . Disseminated intravascular coagulation is not suggestive of TMA. Consider alternative diagnoses, including acute fatty liver (predominant liver injury and coagulopathy) <sup>13</sup> . Deficiency in vitamin B9 and/or B12 may mimic TMA, including during pregnancy <sup>14,15</sup> . Deficiency in iron, vitamin B9 or B12 may explain low reticulocyte count despite hemolysis.                                                                                             |

**Supplemental Table S1: Initial biological work-up in patients with pregnancy-associated thrombotic microangiopathy (P-TMA).**

Abbreviations: P-TTP, pregnancy-associated thrombotic thrombocytopenic purpura. P-HUS, pregnancy-associated hemolytic uremic syndrome.

| Authors                                                                  | Age (y) | History of aHUS             | Complement gene pathogenic variant identified | Timing of pregnancy-aHUS (pregnancy rank)                                                          | Characteristics before eculizumab start                                | Time from admission to eculizumab initiation | Response to eculizumab                                                                         | Neonate Status                                                                                     | Eculizu mab Stopped       | Last follow-up (duration)                                                                                                                 |
|--------------------------------------------------------------------------|---------|-----------------------------|-----------------------------------------------|----------------------------------------------------------------------------------------------------|------------------------------------------------------------------------|----------------------------------------------|------------------------------------------------------------------------------------------------|----------------------------------------------------------------------------------------------------|---------------------------|-------------------------------------------------------------------------------------------------------------------------------------------|
| aHUS during pregnancy                                                    |         |                             |                                               |                                                                                                    |                                                                        |                                              |                                                                                                |                                                                                                    |                           |                                                                                                                                           |
| Andries et al, 2017 <sup>16</sup>                                        | 30      | -                           | None in CFH,CFI, MCP,C3,CFB, THBD,DGKE        | 10 GW (11 <sup>th</sup> /5 miscarriages)                                                           | Plt, 15 G/L<br>SCr 707 µmol/L<br>Dialysis<br>Severe HT                 | 4 days (Resistance to 4 PE)                  | At day 15<br>Plt 150 G/L<br>SCr 215 µmol/L<br>Dialysis stopped<br>At 4 months<br>SCr 46 µmol/L | Healthy infant (36 GW)                                                                             | -                         | HUS remission<br>Normal renal function (20 months)                                                                                        |
| Mandala et al, 2014 <sup>17</sup>                                        | 29      | -                           | None in CFH,CFI, MCP,C3,CFB, THBD, DGKE       | 16 GW* (ND)                                                                                        | Plt 52 G/L<br>SCr 92 µmol/L<br>Severe HT                               | 47 days (resistance to daily PE)             | Immediate improvement of all parameters                                                        | ND                                                                                                 | -                         | HUS remission<br>SCr 62 µmol/L (ND)                                                                                                       |
| Ardissino et al, 2013 <sup>18</sup><br>Mussoni et al, 2014 <sup>19</sup> | 26      | + (2 y earlier)             | CFH Homozygous p. Arg53Cys                    | 17 GW (1 <sup>st</sup> )                                                                           | Plt 102 G/L<br>PU >3g/L<br>SCr 56 µmol/L<br>Severe HT                  | 6 weeks (resistance to 30 PE)                | At day 5<br>Plt 163 G/L<br>Normal SCr<br>Reduced PU                                            | Healthy infant (38 GW)                                                                             | + (after delivery/3 8 GW) | ND                                                                                                                                        |
| Demir et al, 2016 <sup>20</sup>                                          | 17      | -                           | None in CFH or CFI                            | 17 GW (ND)                                                                                         | Plt, 52 G/L<br>SCr 252 µmol/L                                          | 5 days (Resistance to 5 PE)                  | Within few days<br>Plt 202 G/L<br>SCr 71 µmol/L                                                | Caesarean section at 31GW (fetal distress)<br>Neonatal respiratory distress<br>Then healthy infant | -                         | HUS remission<br>Normal renal function (6 months)                                                                                         |
| Tsai et al, 2016 <sup>21</sup>                                           | 22      | + Pregnancy-HUS 2 y earlier | CFH p. Arg1203Trp                             | 22 GW (3 <sup>rd</sup> ) (HT during 1 <sup>st</sup> pregnancy<br>HUS at 2 <sup>nd</sup> pregnancy) | Plt 56 G/L<br>SCr 265 µmol/L                                           | 5 weeks                                      | At day 3<br>Normal Plt<br>At 3 months<br>Normal SCr                                            | Pre-term infant (Induced delivery/ 22 GW)                                                          | -                         | ND                                                                                                                                        |
| Kourouklaris et al, 2014 <sup>22</sup>                                   | 23      | -                           | ND                                            | Preeclampsia at 31 GW<br>HUS 5 days after caesarean section (ND)                                   | Plt 80 G/L<br>SCr 707 µmol/L<br>Dialysis<br>Neurological complications | 6 months (Transient benefit from PE)         | At 6 weeks<br>Plt 141 G/L<br>SCr 247 µmol/L                                                    | ND                                                                                                 | + after 6 weeks**         | HUS relapse<br>5 months after stopping eculizumab<br>Plt 75G/L<br>SCr 486 µmol/L<br>12 months after restoring eculizumab<br>HUS remission |

|                                          |    |   |                                               |                                                                                  |                                                                                                  |                                             |                                                                            |                                                               |                       |                                                                 |
|------------------------------------------|----|---|-----------------------------------------------|----------------------------------------------------------------------------------|--------------------------------------------------------------------------------------------------|---------------------------------------------|----------------------------------------------------------------------------|---------------------------------------------------------------|-----------------------|-----------------------------------------------------------------|
| Shanmugalingam et al, 2018 <sup>23</sup> | 27 | - | None in MCP                                   | 32 GW Preeclampsia /HUS (1 <sup>st</sup> )                                       | PtI 44 G/L<br>SCr 544 µmol/L<br>Dialysis<br>Severe HT                                            | 3 days<br>(Resistance to PE)                | At day 3<br>PtI 158 G/L<br>Dialysis stopped<br>At day 19<br>SCr 105 µmol/L | Pre-term healthy infant (induced delivery at 32GW)            | -                     | SCr 132 µmol/L<br>HUS remission<br>SCr 110 µmol/L<br>(2 months) |
| Asif et al, 2017 <sup>24</sup>           | 33 | - | ND                                            | 33 GW<br>Extensive blood loss after caesarean section /hysterectomy (ND)         | PtI, 39 G/L<br>SCr 530 µmol/L<br>Dialysis                                                        | ~ 6 days<br>(resistance to 5 PE)            | At 2 weeks<br>PtI, 147 G/L<br>SCr 300 µmol/L<br>Dialysis stopped           | In utero foetal death (33 GW)                                 | -                     | HUS remission<br>Normal renal function<br>(6 months)            |
| Chua et al, 2017 <sup>25</sup>           | 34 | - | ND                                            | 33 GW<br>(ND)                                                                    | PtI, 88 G/L<br>SCr 300 µmol/L<br>Dialysis<br>Neurological, intestinal and vascular complications | ~ 6 days<br>(Resistance to 5 PE)            | At day 4<br>Hemolysis improved<br>At day 40<br>Dialysis stopped            | In utero foetal death (33 GW)                                 | -                     | HUS remission<br>Normal renal function<br>(8.5 months)          |
| Cravero et al, 2016 <sup>26</sup>        | 33 | - | None in CFH,CFI, MCP,C3,CFB<br>No anti-CFH Ab | 36 GW<br>(1 <sup>st</sup> )                                                      | PtI 200 G/L (under PE)<br>Anuria<br>Dialysis                                                     | 5 days<br>(Renal resistance to PE)          | At ~ 1 week<br>SCr 62 µmol/L                                               | Caesarean section (36 GW) (foetal distress)<br>Healthy infant | -                     | HUS remission<br>Normal renal function<br>(9 months)            |
| Chua et al, 2017 <sup>25</sup>           | 29 | - | ND                                            | 37 GW<br>(ND)                                                                    | PtI, 70 G/L<br>SCr 495 µmol/L                                                                    | 2 days<br>(after 2 PE)                      | At 2.5w<br>Hemolysis markers normalized<br>At 1m<br>Screat 80 µmol/L       | In utero fetal death (37 GW)                                  | +<br>after 3 weeks*** | HUS remission<br>Normal renal function<br>(7 months)****        |
| Yamaguchi et al, 2017 <sup>27</sup>      | 25 | - | CFH Homozygous p.R1215G                       | Preeclampsia at 37.5 GW<br>HUS 2 days after caesarean section (1 <sup>st</sup> ) | PtI 110 G/L<br>SCr 177 µmol/L<br>Neurological complications<br>Carotid arteries stenosis         | 74 days<br>(Transient improvement under PE) | At ~ 2 weeks<br>PtI 250 G/L<br>SCr 72 µmol/L                               | Healthy infant (37.5 GW)                                      | -                     | HUS remission<br>Normal renal function<br>(7.5 months)          |

aHUS after delivery

|                                                                                       |    |   |                                             |                                                                       |                                                                |                                                  |                                                                                             |                |                   |                                                                                                                                      |
|---------------------------------------------------------------------------------------|----|---|---------------------------------------------|-----------------------------------------------------------------------|----------------------------------------------------------------|--------------------------------------------------|---------------------------------------------------------------------------------------------|----------------|-------------------|--------------------------------------------------------------------------------------------------------------------------------------|
| Canigral et al, 2013 <sup>28</sup>                                                    | 32 | - | None identified in CFH,CFI, MCP             | At delivery (severe bleeding after caesarean section) (ND)            | Plt 30 G/L<br>SCr 390 µmol/L                                   | 3 days (resistance to PE)                        | At 7 days<br>Plt 150G/L<br>At ~ 2 months<br>Normal SCr                                      | ND             | +, after 6 months | HUS remission<br>Normal renal function (6 months)****                                                                                |
| Gately et al, 2017 <sup>29</sup>                                                      | 32 | - | ND                                          | At delivery at 40 GW (severe post-partum bleeding) (1 <sup>st</sup> ) | Plt 44 G/L<br>SCr 170 µmol/L<br>Dialysis at 4 days post-partum | 6 days (renal resistance to 4 PE)                | At 9 days<br>Dialysis stopped                                                               | ND             | -                 | HUS remission<br>SCr 145 µmol/L (1 month)                                                                                            |
| Saad et al, 2015 <sup>30</sup>                                                        | 16 | - | MCP p.T383I                                 | 1 day after delivery (39 GW) (1 <sup>st</sup> )                       | Before PE<br>Plt 50 G/L<br>SCr 210 µmol/L                      | 46 days (Plt 180 G/L SCr 124 µmol/L after 14 PE) | Maintenance of normal Plt and improved SCr                                                  | ND             | -                 | HUS remission (ND)                                                                                                                   |
| Zschiedrich et al, 2013 <sup>31</sup>                                                 | 31 | - | CFI p.Gly263AlafsX37                        | 3 days after delivery (41GW) (ND)                                     | Plt 88 G/L<br>SCR 400 µmol/L<br>Dialysis<br>Delirium           | 18 days (resistance to 27 PE)                    | Within 2 weeks<br>Plt normalized<br>SCr 88 µmol/L                                           | Healthy infant | -                 | HUS remission<br>SCr 88 µmol/L (2.5 months)                                                                                          |
| De Sousa-Amorim et al, 2015 <sup>32</sup>                                             | 41 | - | None in CFH,CFI, MCP,C3,CFB. No anti-CFH Ab | 4 days after full term delivery (1 <sup>st</sup> )                    | Plt 105 G/L<br>SCr 292 µmol/L<br>Dialysis<br>Severe HT         | 12 days (resistance to 5 PE)                     | At 4 days<br>Plt 130 G/L<br>Dialysis stopped<br>At 4 weeks<br>Plt 180 G/L<br>SCr 97 µmol/L  | Healthy infant | + after 11 months | HUS remission<br>Normal renal function (1 year)****                                                                                  |
| Carr et al, 2012 <sup>33</sup>                                                        | 20 | - | CFH (variant ND)                            | 7 days after caesarean section (39 GW) (ND)                           | Plt 28 G/L<br>SCr 723 µmol/L<br>Dialysis                       | 7 days (resistance to PE)                        | At 2 weeks<br>Plt normalized<br>At 6 weeks<br>Dialysis stopped<br>At 12 weeks<br>Normal SCr | ND             | +, after 9 m      | HUS relapse 6 months after stopping Ec<br>Plt 54 G/L<br>SCr 447 µmol/L<br>Dialysis<br>Remission after eculizumab restoring           |
| Delmas et al, 2013 <sup>34</sup><br>Fakhouri et al, 2014 <sup>35</sup><br>(patient 1) | 26 | - | CFH p.Lys1186Thr<br>CFI p.Ile322Thr         | 1w week after full term delivery (1 <sup>st</sup> )                   | Plt 49 G/L<br>SCr 550 µmol/L<br>Dialysis                       | 3 days (resistance to PE)                        | At 15 days<br>Dialysis stopped<br>At 42 days<br>Plt normalized<br>At 6 months               | Healthy infant | + after 18 m      | Remission of HUS 5 y after stopping eculizumab<br>Normal renal function<br>2 <sup>nd</sup> pregnancy, 34 GW Plt 110 G/L, proteinuria |

|                                     |    |   |                  |                                                         |                                           |                                     |                                                                  |    |   |                                                                                                                                                                                                   |
|-------------------------------------|----|---|------------------|---------------------------------------------------------|-------------------------------------------|-------------------------------------|------------------------------------------------------------------|----|---|---------------------------------------------------------------------------------------------------------------------------------------------------------------------------------------------------|
|                                     |    |   |                  |                                                         |                                           |                                     | SCr 75 µmol/L                                                    |    |   | Ecilizumab reinitiated<br>Caesarean section (foetal<br>stagnation) at 36 GW<br>Ecilizumab stopped after 6<br>months<br>Sustained remission and normal<br>renal function during<br>subsequent year |
| Baghli et al,<br>2017 <sup>36</sup> | 23 | - | C3<br>p.Arg735Tr | 2 weeks after delivery (38<br>GW)<br>(1 <sup>st</sup> ) | Plt 177 G/L<br>SCr 377 µmol/L<br>Dialysis | ~ 14 days<br>(resistance to few PE) | At 4 months<br>Plt 201 G/L<br>SCr 123 µmol/L<br>Dialysis stopped | ND | - | HUS remission<br>(8 months)                                                                                                                                                                       |

**Supplemental Table S2:** Characteristics and outcome of 20 individual cases of pregnancy and postpartum-associated atypical HUS treated with ecilizumab. Fifteen additional patients with pregnancy-aHUS treated with ecilizumab are indicated in 3 series: 4 patients in Bruel et al (2017)<sup>5</sup>, 10 in Huerta et al (2018)<sup>6</sup> and 1 in Gaggl et al (2018)<sup>37</sup>, with an excellent response in all. Ecilizumab discontinuation was reported in 7 patients (Huerta 2018) after a median time of 10 months (IQR: 6,11), including 2 carriers of pathogenic variants. One of the patients with a pathogenic variant (Hybrid CFH) had recurrence of HUS after 7 months, the other was relapse-free after 481 days follow-up. One of the patients without variant had recurrence 5 months after discontinuation. Both patients with recurrence were in remission after restoring ecilizumab treatment.

**Abbreviations:** Ab, antibodies; aHUS, atypical haemolytic uremic syndrome; CFB, complement factor B; CFH, complement factor H; CFI, complement factor I; d, day; Ec, ecilizumab; GW, gestational weeks; m, month; MCP, membrane cofactor protein (CD46); ND, not documented; PE, plasma exchanges; Plt, platelet count; Screat, serum creatinine; THDB, thrombomodulin.

\*, The patient experienced severe bleeding after caesarean section (17 GW). \*\*, the patient received 6 doses of ecilizumab. \*\*\*, the patient received 4 doses of ecilizumab.\*\*\*\*, follow-up after ecilizumab discontinuation.



## References:

1. Fakhouri F, Zuber J, Fremeaux-Bacchi V, Loirat C. Haemolytic uraemic syndrome. *Lancet*. 2017;217(390):681-696.
2. Fremeaux-Bacchi V, Fakhouri F, Garnier A, et al. Genetics and outcome of atypical hemolytic uremic syndrome: a nationwide French series comparing children and adults. *Clin J Am Soc Nephrol*. 2013;8(4):554-562.
3. Noris M, Caprioli J, Bresin E, et al. Relative role of genetic complement abnormalities in sporadic and familial aHUS and their impact on clinical phenotype. *Clin J Am Soc Nephrol*. 2010;5(10):1844-1859.
4. Palomo M, Blasco M, Molina P, et al. Complement Activation and Thrombotic Microangiopathies. *Clin J Am Soc Nephrol*. 2019;14(12):1719-1732.
5. Bruel A, Kavanagh D, Noris M, et al. Hemolytic Uremic Syndrome in Pregnancy and Postpartum. *Clin J Am Soc Nephrol*. 2017;12(8):1237-1247.
6. Huerta A, Arjona E, Portoles J, et al. A retrospective study of pregnancy-associated atypical hemolytic uremic syndrome. *Kidney Int*. 2018;93(2):450-459.
7. Ardissino G, Possenti I, Tel F, Testa S, Salardi S, Ladisa V. Discontinuation of eculizumab treatment in atypical hemolytic uremic syndrome: an update. *Am J Kidney Dis*. 2015;66(1):172-173.
8. Fakhouri F, Fila M, Provot F, et al. Pathogenic Variants in Complement Genes and Risk of Atypical Hemolytic Uremic Syndrome Relapse after Eculizumab Discontinuation. *Clin J Am Soc Nephrol*. 2017;12(1):50-59.
9. Wetzels JF, van de Kar NC. Discontinuation of eculizumab maintenance treatment for atypical hemolytic uremic syndrome. *Am J Kidney Dis*. 2015;65(2):342.
10. George JN. Cobalamin C deficiency-associated thrombotic microangiopathy: uncommon or unrecognized? *Lancet*. 2015;386(9997):1012.
11. Grange S, Bekri S, Artaud-Macari E, et al. Adult-onset renal thrombotic microangiopathy and pulmonary arterial hypertension in cobalamin C deficiency. *Lancet*. 2015;386(9997):1011-1012.
12. Huemer M, Scholl-Burgi S, Hadaya K, et al. Three new cases of late-onset cblC defect and review of the literature illustrating when to consider inborn errors of metabolism beyond infancy. *Orphanet J Rare Dis*. 2014;9:161.
13. Nelson DB, Byrne JJ, Cunningham FG. Acute Fatty Liver of Pregnancy. *Clin Obstet Gynecol*. 2019.
14. Hartong SC, Steegers EA, Visser W. Hemolysis, elevated liver enzymes and low platelets during pregnancy due to Vitamin B12 and folate deficiencies. *Eur J Obstet Gynecol Reprod Biol*. 2007;131(2):241-242.
15. Routh JK, Koenig SC. Severe vitamin B12 deficiency mimicking thrombotic thrombocytopenic purpura. *Blood*. 2014;124(11):1844.
16. Andries G, Karass M, Yandrapalli S, et al. Atypical hemolytic uremic syndrome in first trimester pregnancy successfully treated with eculizumab. *Exp Hematol Oncol*. 2017;6:4.

17. Mandala EM GS, Kasimatis E, Lafaras C, Chalevas P, Tsioni K, Kyrka K, Oikonomidou D, Dinas K, Loufopoulos A, Efstratiadis G, Vasilia G, Garyfallos AA. . Pregnancy-Associated Atypical Hemolytic Uremic Syndrome (aHUS), Treated with Eculizumab. *Blood* 2014;(2014) 124 (21): 5019.
18. Ardissino G, Wally Ossola M, Baffero GM, Rigotti A, Cugno M. Eculizumab for atypical hemolytic uremic syndrome in pregnancy. *Obstet Gynecol.* 2013;122(2 Pt 2):487-489.
19. Mussoni MP, Veneziano FA, Boetti L, et al. Innovative therapeutic approach: sequential treatment with plasma exchange and eculizumab in a pregnant woman affected by atypical hemolytic-uremic syndrome. *Transfus Apher Sci.* 2014;51(2):134-136.
20. Demir E, Yazici H, Ozluk Y, Kilicaslan I, Turkmen A. Pregnant Woman with Atypical Hemolytic Uremic Syndrome Delivered a Healthy Newborn under Eculizumab Treatment. *Case Rep Nephrol Dial.* 2016;6(3):143-148.
21. Tsai HM, Kuo E. From Gestational Hypertension and Preeclampsia to Atypical Hemolytic Uremic Syndrome. *Obstet Gynecol.* 2016;127(5):907-910.
22. Kourouklaris A, Ioannou K, Athanasiou I, Panagidou A, Demetriou K, Zavros M. Postpartum thrombotic microangiopathy revealed as atypical hemolytic uremic syndrome successfully treated with eculizumab: a case report. *J Med Case Rep.* 2014;8:307.
23. Shanmugalingam R, Hsu D, Makris A. Pregnancy-induced atypical haemolytic uremic syndrome: A new era with eculizumab. *Obstet Med.* 2018;11(1):28-31.
24. Asif A, Nayer A, Haas CS. Atypical hemolytic uremic syndrome in the setting of complement-amplifying conditions: case reports and a review of the evidence for treatment with eculizumab. *J Nephrol.* 2017;30(3):347-362.
25. Chua J, Paizis K, He SZ, Mount P. Suspected atypical haemolytic uraemic syndrome in two post-partum patients with foetal-death in utero responding to eculizumab. *Nephrology (Carlton).* 2017;22 Suppl 1:18-22.
26. Cravero R, Ardissino G, Colageo U, et al. [Efficacy of eculizumab in a case of pregnancy-associated aHUS]. *G Ital Nefrol.* 2016;33(4).
27. Yamaguchi M, Hori M, Hiroshi N, Maruyama S. Postpartum atypical hemolytic uremic syndrome with complement factor H mutation complicated by reversible cerebrovascular constriction syndrome successfully treated with eculizumab. *Thromb Res.* 2017;151:79-81.
28. Canigral C, Moscardo F, Castro C, et al. Eculizumab for the treatment of pregnancy-related atypical hemolytic uremic syndrome. *Ann Hematol.* 2013;93(8):1421-1422.
29. Gately R, San A, Kurtkoti J, Parnham A. Life-threatening pregnancy-associated atypical haemolytic uraemic syndrome and its response to eculizumab. *Nephrology (Carlton).* 2017;22 Suppl 1:32-35.
30. Saad AF, Roman J, Wyble A, Pacheco LD. Pregnancy-Associated Atypical Hemolytic-Uremic Syndrome. *AJP Rep.* 2016;6(1):e125-128.
31. Zschiedrich S, Prager EP, Kuehn EW. Successful treatment of the postpartum atypical hemolytic uremic syndrome with eculizumab. *Ann Intern Med.* 2013;159(1):76.
32. De Sousa Amorim E, Blasco M, Quintana L, Sole M, de Cordoba SR, Campistol JM. Eculizumab in pregnancy-associated atypical hemolytic uremic syndrome: insights for optimizing management. *J Nephrol.* 2015;28(5):641-645.

33. Carr R, Cataland SR. Relapse of aHUS after discontinuation of therapy with eculizumab in a patient with aHUS and factor H mutation. *Ann Hematol.* 2013;92(6):845-846.
34. Delmas Y, Bordes C, Loirat C, Fremeaux-Bacchi V, Combe C. Post-partum atypical haemolytic-uraemic syndrome treated with eculizumab: terminal complement activity assessment in clinical practice. *Clin Kidney J.* 2013;6(2):243-244.
35. Fakhouri F, Delmas Y, Provot F, et al. Insights from the use in clinical practice of eculizumab in adult patients with atypical hemolytic uremic syndrome affecting the native kidneys: an analysis of 19 cases. *Am J Kidney Dis.* 2014;63(1):40-48.
36. Baghli S, Abendroth C, Farooq U, Schaub JA. Atypical Presentation of Pregnancy-Related Hemolytic Uremic Syndrome. *Am J Kidney Dis.* 2018;72(3):451-456.
37. Gaggl M, Aigner C, Csuka D, et al. Maternal and Fetal Outcomes of Pregnancies in Women with Atypical Hemolytic Uremic Syndrome. *J Am Soc Nephrol.* 2018;29:1020-1029.
38. Hanouna G, Morel N, Le Thi Huong D, et al. Catastrophic antiphospholipid syndrome and pregnancy: an experience of 13 cases. *Rheumatology (Oxford).* 2013;52(9):1635-1641.

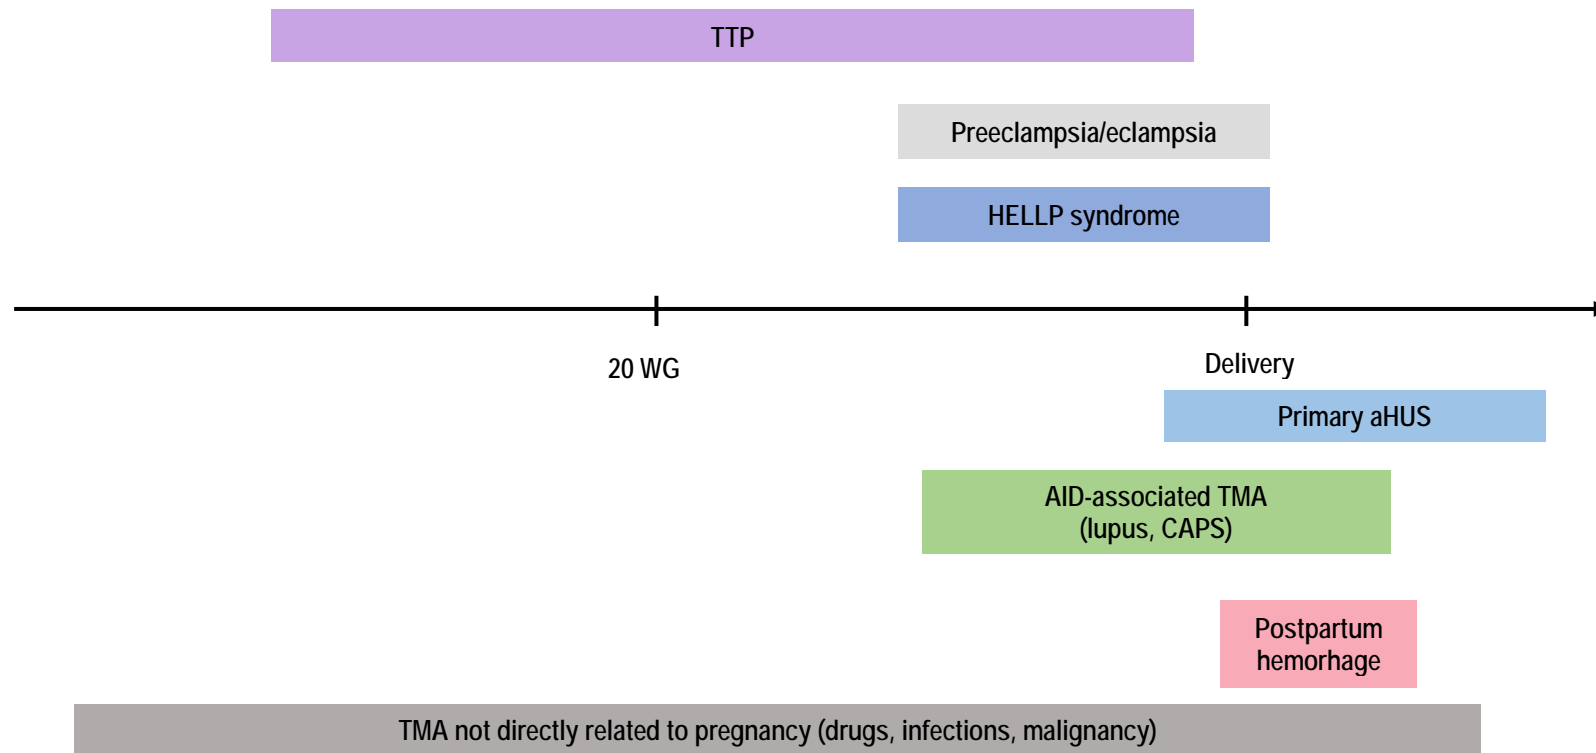

**Supplemental Figure S1:** Timing during pregnancy and postpartum of the main causes of pregnancy-associated thrombotic microangiopathies (TMA). In a patient presenting with TMA before 20 weeks of gestation, the most likely diagnosis is TTP. The differential diagnosis aims to rule out the less likely diagnosis, particularly aHUS and autoimmune diseases-associated TMA. In a patient presenting with TMA during pregnancy after 20 weeks of gestation, PE/eclampsia and HELLP syndrome are the most likely diagnoses. In a patient presenting with TMA in the postpartum of an uneventful pregnancy, the most likely diagnoses are PE/E and aHUS. TMA that develops several weeks after delivery is highly suggestive of aHUS. Other differential diagnoses such as HELLP, postpartum hemorrhage, sepsis, TTP, autoimmune diseases exacerbated by pregnancy (although disorders may be inter-linked, e.g. CAPS following HELLP syndrome<sup>38</sup>) or TMA not directly related to pregnancy are less likely.

Abbreviations: TTP, thrombotic thrombocytopenic purpura. HELLP, Hemolysis, Elevated Liver enzymes and Low platelet count. aHUS, atypical haemolytic uremic syndrome. AID, auto-immune diseases.

## **Consensus process**

Fadi Fakhouri, Marie Scully and Vassilis Tsatsaris conceived the idea of an international consensus on pregnancy-associated thrombotic microangiopathy and established the framework of the manuscript. All participants were invited to join the working group (The International Working Group on Pregnancy-Related Thrombotic Microangiopathies) based on their internationally recognized expertise in the field of pregnancy and thrombotic microangiopathies.

Marie Scully, Paul Coppo and Agnès Veyradier reviewed the relevant literature and wrote the draft of the section related to the diagnosis and treatment of pregnancy-associated thrombotic thrombocytopenic purpura.

Miquel Blasco, Fadi Fakhouri and Véronique Frémeaux-Bacchi reviewed the relevant literature and wrote the draft of the section related to the diagnosis of pregnancy-associated hemolytic uremic syndrome.

Giuseppe Remuzzi and Marina Noris reviewed the relevant literature and wrote the draft of the section related to the treatment of pregnancy-associated hemolytic uremic syndrome.

Chantal Loirat and Fadi Fakhouri wrote the draft of the section related to the counselling of a patient with a history of atypical HUS.

Vassilis Tsatsaris and Norbert Winer reviewed the relevant literature and wrote the draft of the sections related to preeclampsia/eclampsia and HELLP syndrome.

François Provôt reviewed the relevant literature and wrote the draft of the sections related to renal cortical necrosis in the setting of pregnancy.

Miquel Blasco designed Figure 1 and Fadi Fakhouri the remaining Figures.

The manuscript was circulated several times among all the authors who reviewed it and included substantial modifications. All authors have approved the initial and revised versions of the manuscript.
